# Supplementary material
Source: PubMed Central journal article supplement (PMC3352161)
Supplement: supp_61.9.2112_67421-Supp.pdf [file supp_61.9.2112_67421-Supp.pdf]

**Supplementary Table S1.** Whole-cell fatty acid composition of strain RB72<sup>T</sup> and related species of the genus *Streptomyces*

Strains: 1, RB72<sup>T</sup>; 2, *Streptomyces hachijoensis* NRRL B-3106<sup>T</sup>; 3, *S. kentuckensis* NRRL B-1831<sup>T</sup>. All data were determined in the laboratory under the same growth conditions. Fatty acids were identified by co-elution with known standards and mass spectral analysis of their methyl and picolinyl esters. Fatty acids are listed in order of elution on a DB-1 column and named using the format X:Y $\omega$ Z, where X represents the number of carbons in the molecule, Y represents the number of double bonds present and Z represents the position of the double bond in reference to the aliphatic or 'ω' end of the molecule. i and a indicate iso and anteiso branching patterns, respectively; cy indicates cyclo; br indicates that the branching pattern is unknown; when the position of the double bond is not given, it is unknown. Data are presented as mean $\pm$ SD ( $n=3$ ) of weight per cent of total fatty acids.

| Fatty Acid       | 1              | 2              | 3              |
|------------------|----------------|----------------|----------------|
| i14:0            | 9.2 $\pm$ 0.3  | 24.5 $\pm$ 2.1 | 4.8 $\pm$ 0.4  |
| 14:0             | 0.1 $\pm$ 0.0  |                |                |
| i15:0            | 12.9 $\pm$ 0.1 | 3.2 $\pm$ 0.5  | 9.6 $\pm$ 0.1  |
| a15:0            | 10.9 $\pm$ 0.1 | 9.5 $\pm$ 1.1  | 25.2 $\pm$ 0.5 |
| 15:0             | 2.2 $\pm$ 0.0  | 1.1 $\pm$ 1.1  | 1.0 $\pm$ 0.1  |
| i16:1 $\omega$ 7 | 1.4 $\pm$ 0.1  | 3.5 $\pm$ 0.3  | 1.6 $\pm$ 0.2  |
| i16:0            | 34.8 $\pm$ 1.7 | 46.2 $\pm$ 4.4 | 28.5 $\pm$ 0.5 |
| 16:1 $\omega$ 7  | 0.3 $\pm$ 0.1  |                | 0.2 $\pm$ 0.0  |
| 16:1             | 0.4 $\pm$ 0.1  | 0.6 $\pm$ 0.0  | 0.2 $\pm$ 0.0  |
| 16:0             | 1.2 $\pm$ 0.9  |                | 1.8 $\pm$ 0.0  |
| i17:1            | 1.1 $\pm$ 0.1  |                | 1.5 $\pm$ 0.1  |
| i17:1 $\omega$ 8 | 11.1 $\pm$ 0.3 | 8.4 $\pm$ 0.3  | 3.1 $\pm$ 0.2  |
| i17:0            | 1.6 $\pm$ 0.1  | 0.4 $\pm$ 0.1  | 2.8 $\pm$ 0.1  |
| a17:0            | 2.0 $\pm$ 0.1  | 1.5 $\pm$ 0.1  | 9.7 $\pm$ 0.5  |
| cy17:0           | 4.4 $\pm$ 0.1  | 0.4 $\pm$ 0.2  | 4.6 $\pm$ 0.1  |
| 17:0             | 0.1 $\pm$ 0.0  | 0.1 $\pm$ 0.0  | 0.4 $\pm$ 0.0  |
| br18:1a          | 3.8 $\pm$ 0.1  | 0.1 $\pm$ 0.0  | 1.6 $\pm$ 0.1  |
| br18:1b          | 1.3 $\pm$ 0.0  | 0.2 $\pm$ 0.0  | 2.1 $\pm$ 0.1  |
| i18:0            | 0.1 $\pm$ 0.0  | 0.3 $\pm$ 0.1  | 0.1 $\pm$ 0.0  |
| 18:1 $\omega$ 7  | 0.9 $\pm$ 0.1  | 0.1 $\pm$ 0.0  | 1.2 $\pm$ 0.1  |
| 18:0             | 0.2 $\pm$ 0.1  |                |                |
